# Supplementary material for: Evolutionary genomics of LysM genes in land plants
Source: PubMed Central journal article supplement (PMC2728734; doi:10.1186/1471-2148-9-183), 2009-08-03
Supplement: 1471-2148-9-183-S2.pdf [file 1471-2148-9-183-S2.pdf]

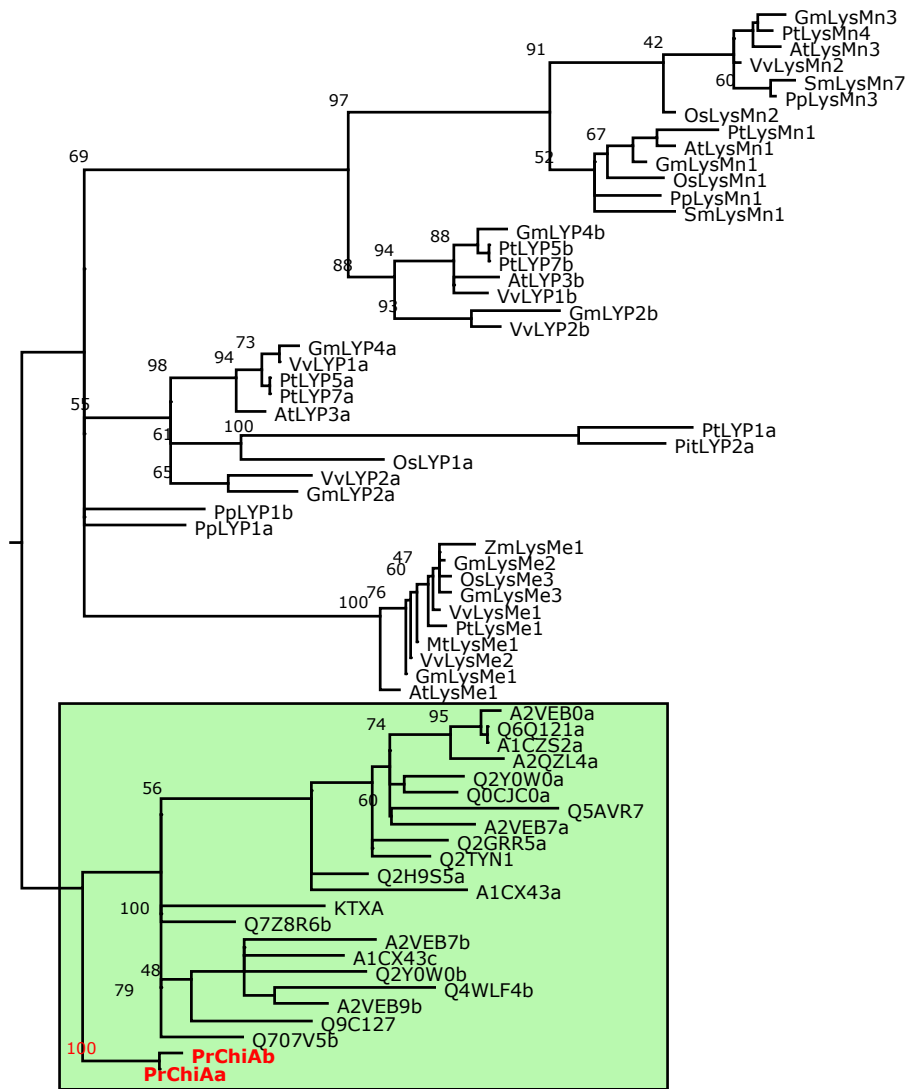

Figure S1  
Zhang et al.

Figure S1. The LysM motifs of *Pteris ryukyuensis* chitinase A (PrChiA) are associated with fungal LysM motifs. A majority-ruled parsimony tree with maximum-likelihood branch lengths was calculated using selected plant LysM motif sequences and fungal LysM motifs in glycol\_hydro\_18 proteins. Bootstrap values of 1000 independent trees larger than 40 were labeled on each branch. The fungal sequences were extracted from the Pfam database.
